# Supplementary material
Source: PubMed Central journal article supplement (PMC4304877)

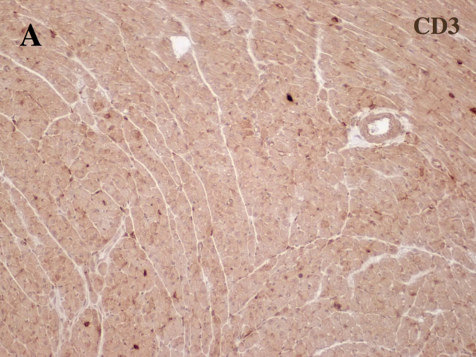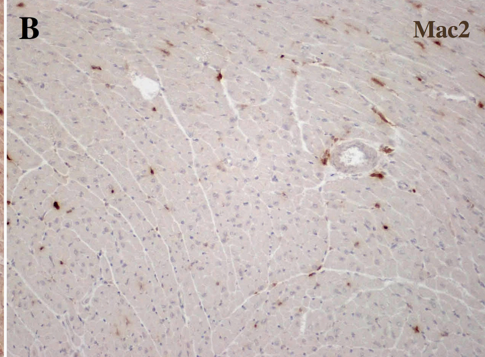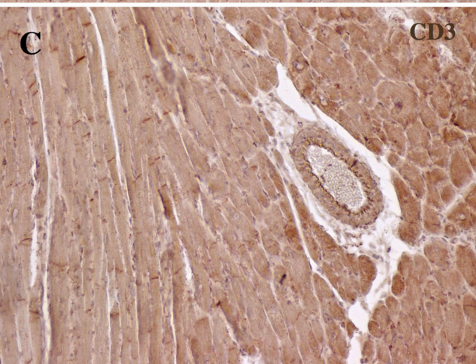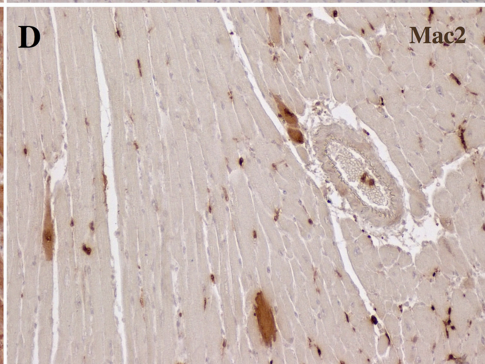

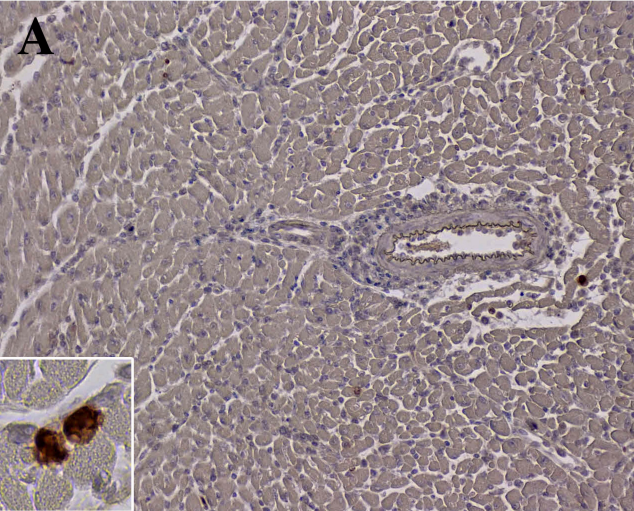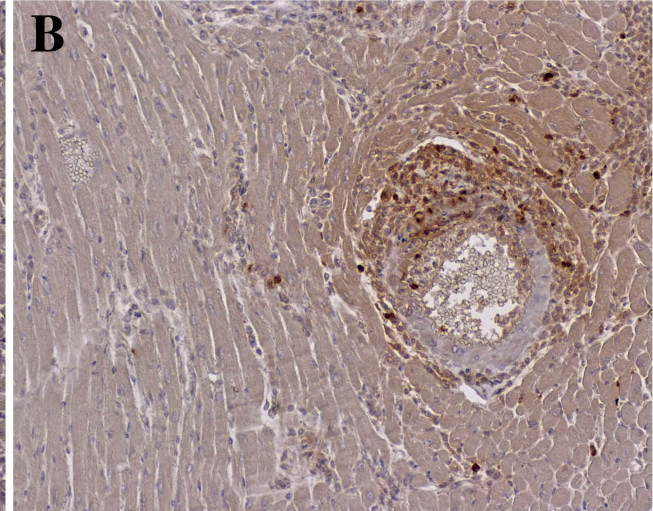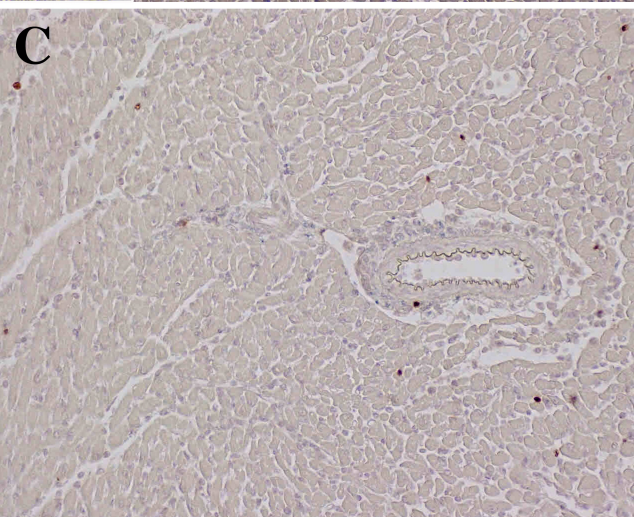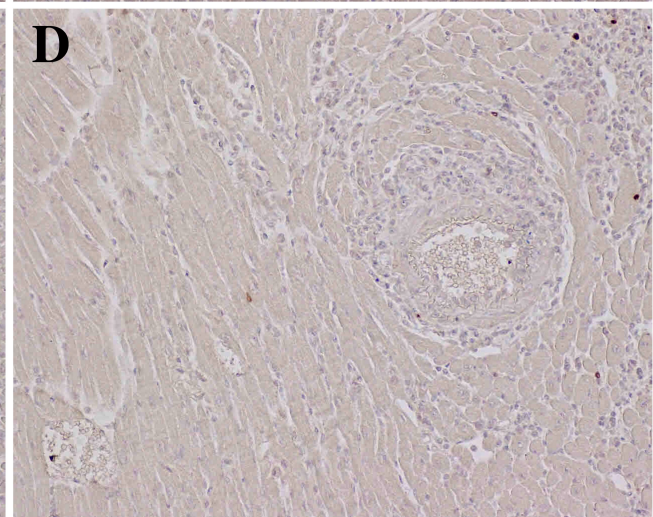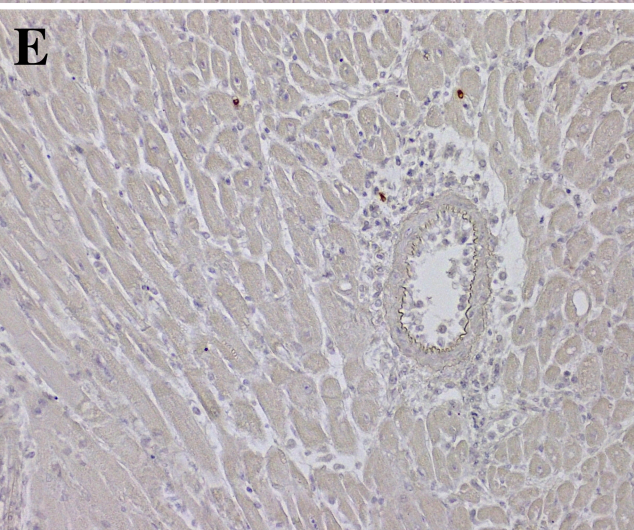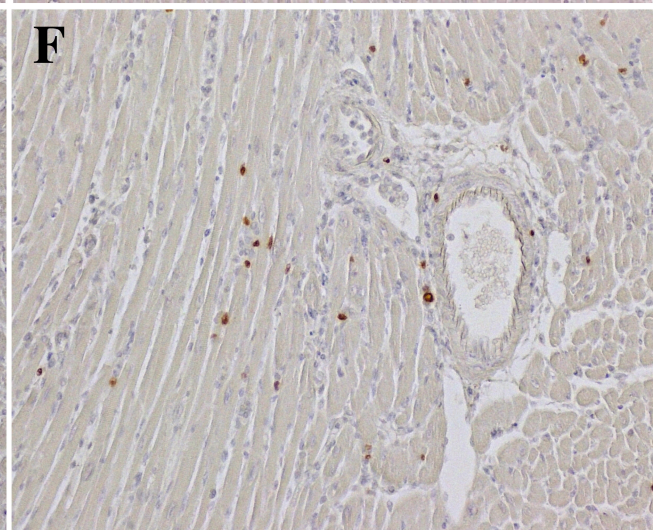

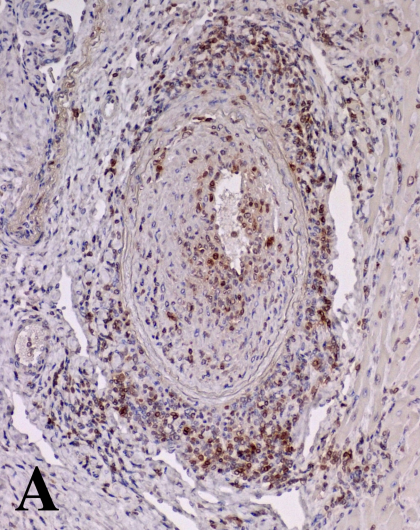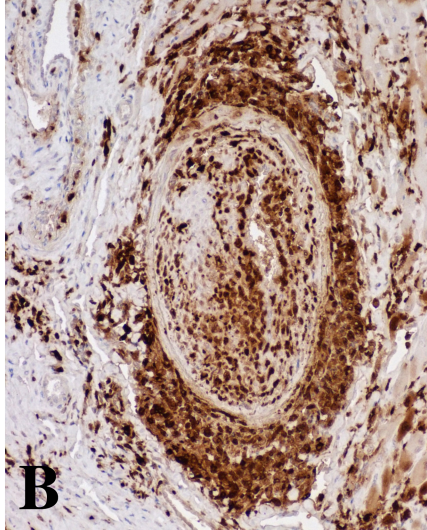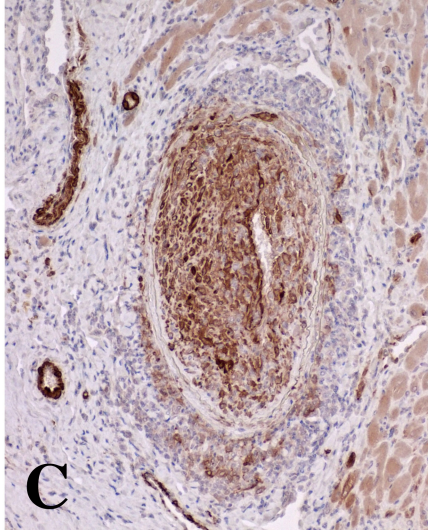

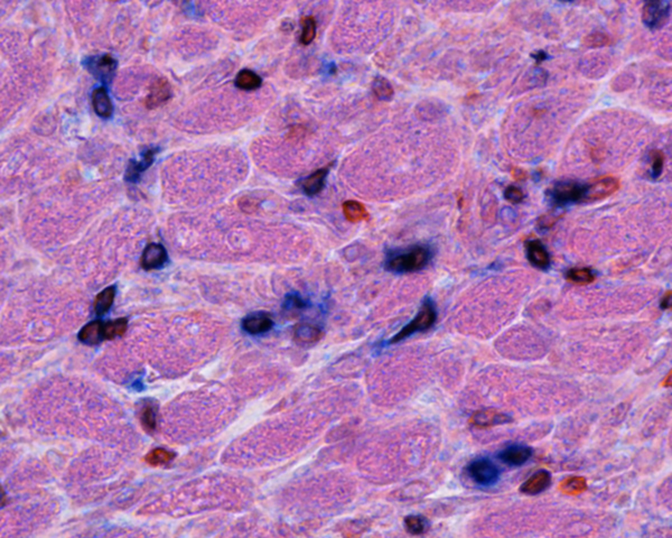

### Interstitialium

TLR4

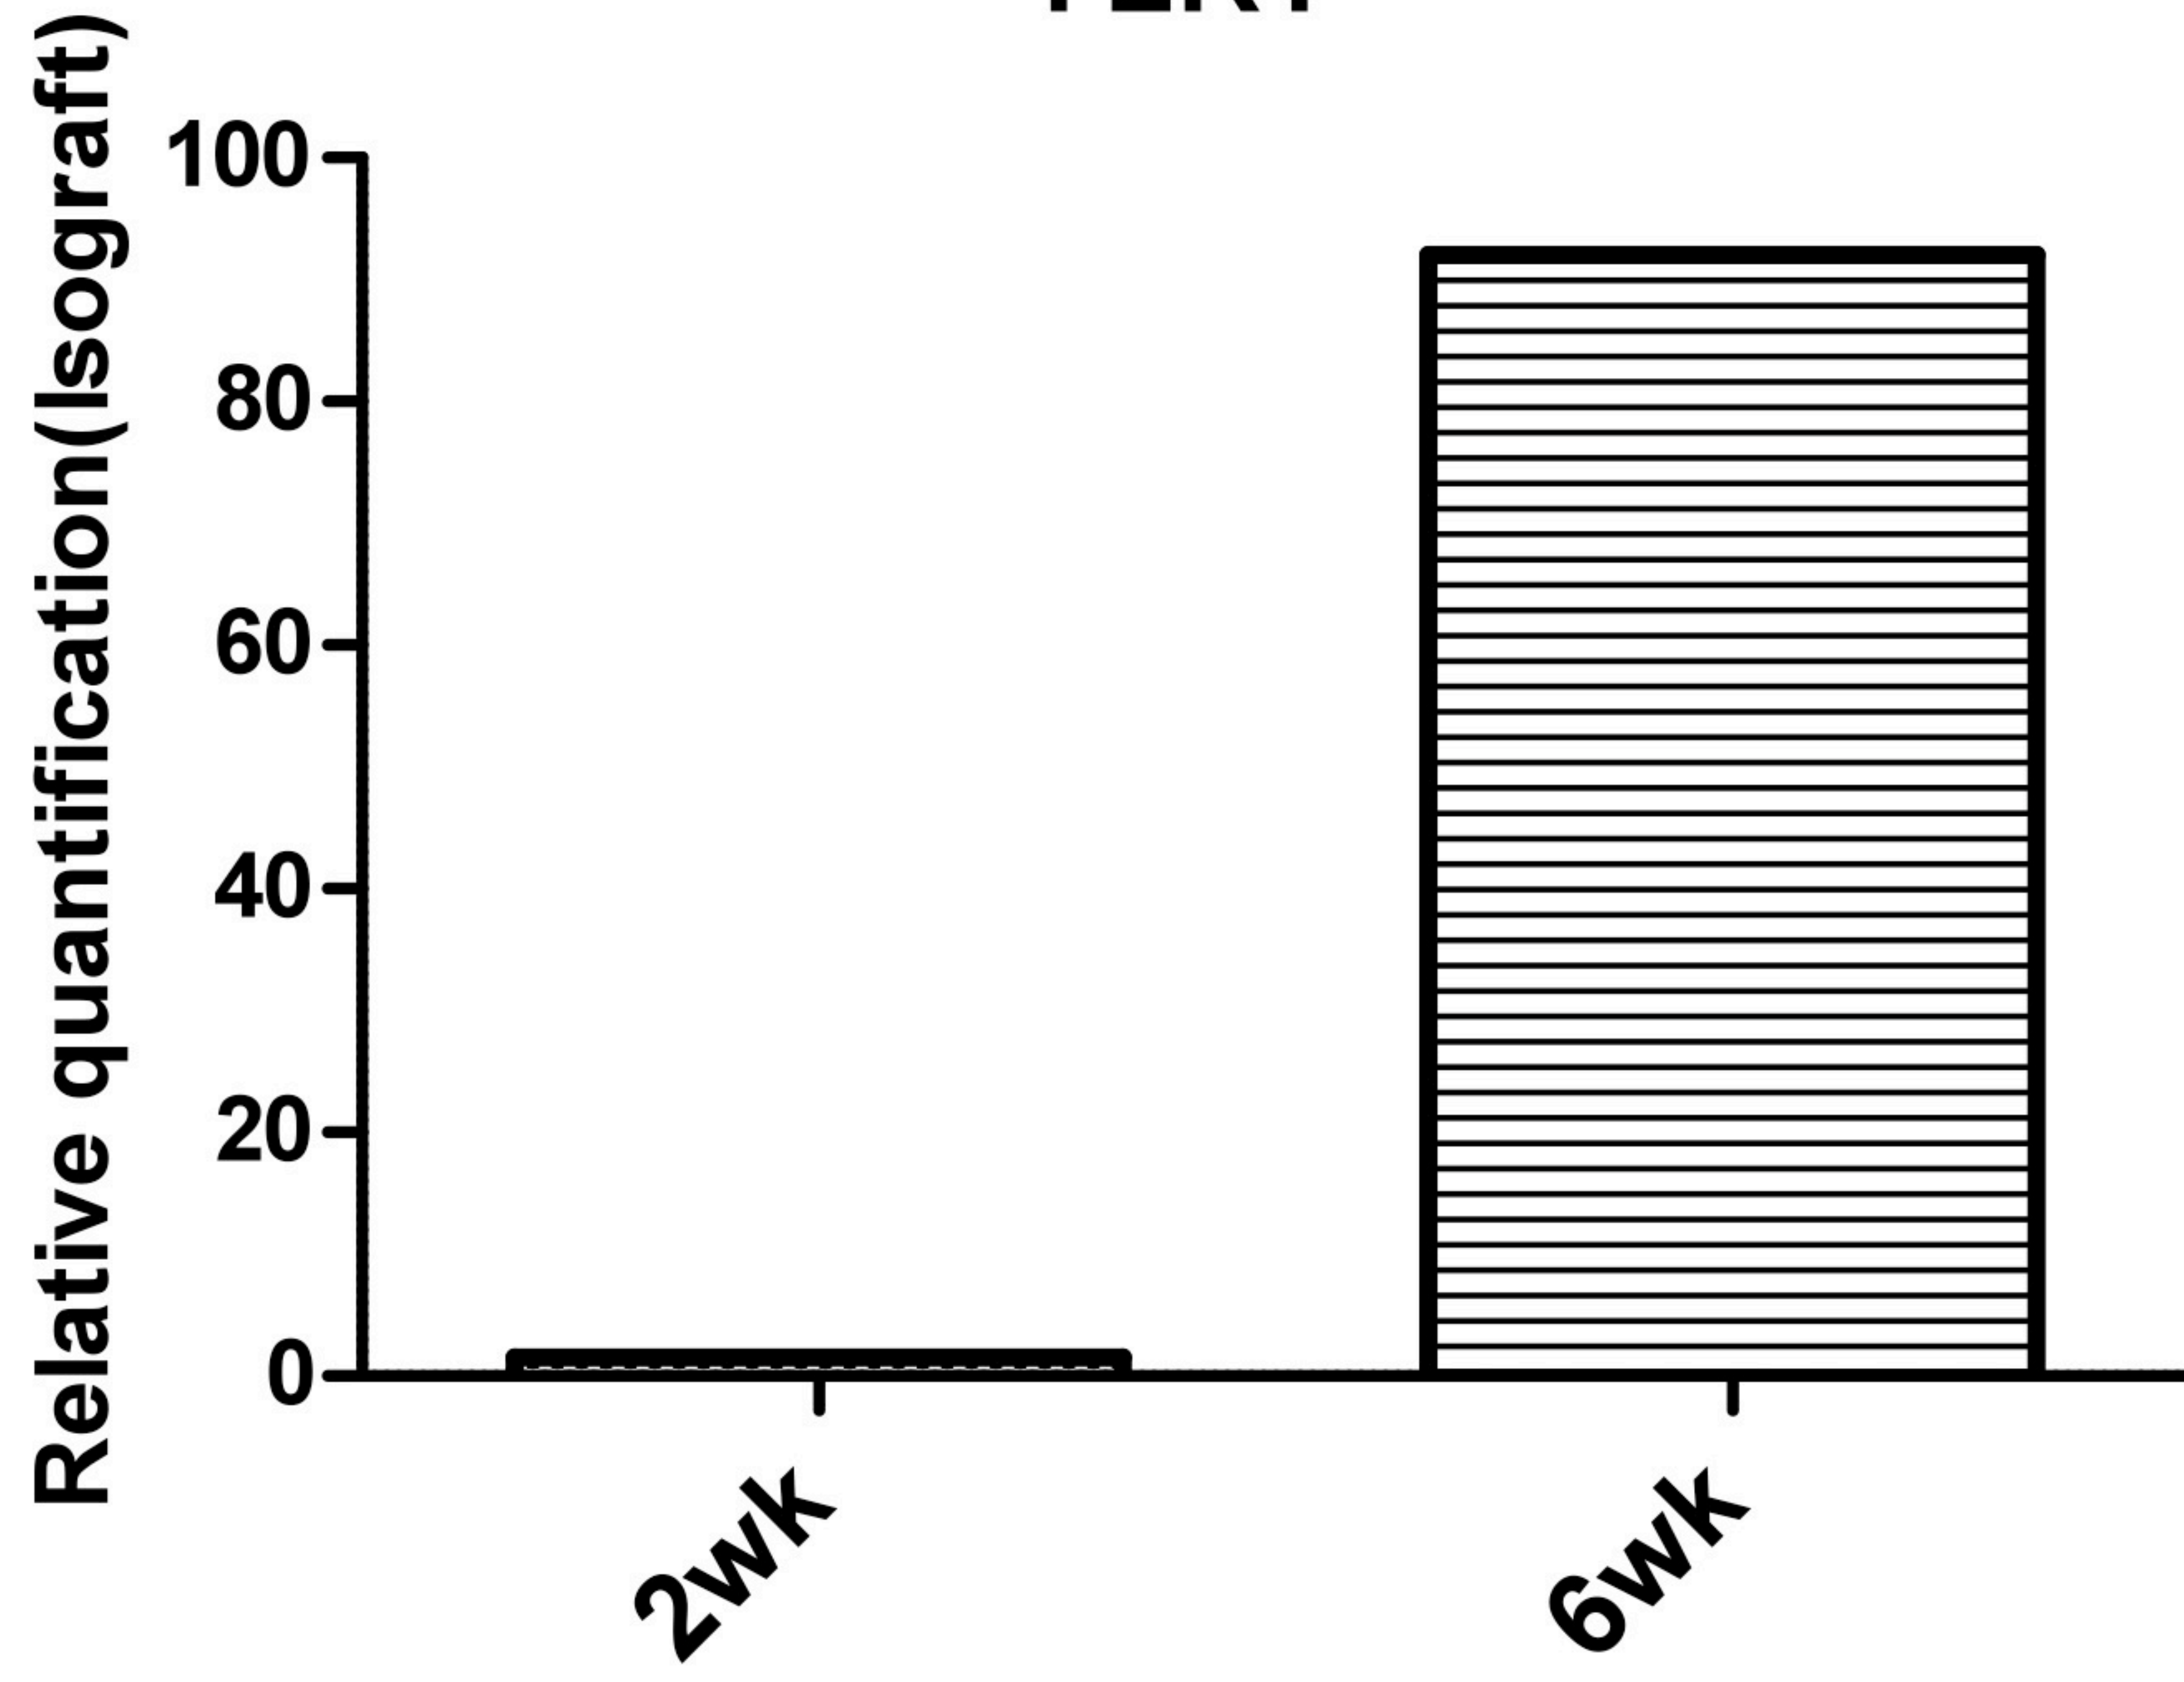

### Artery

TLR4

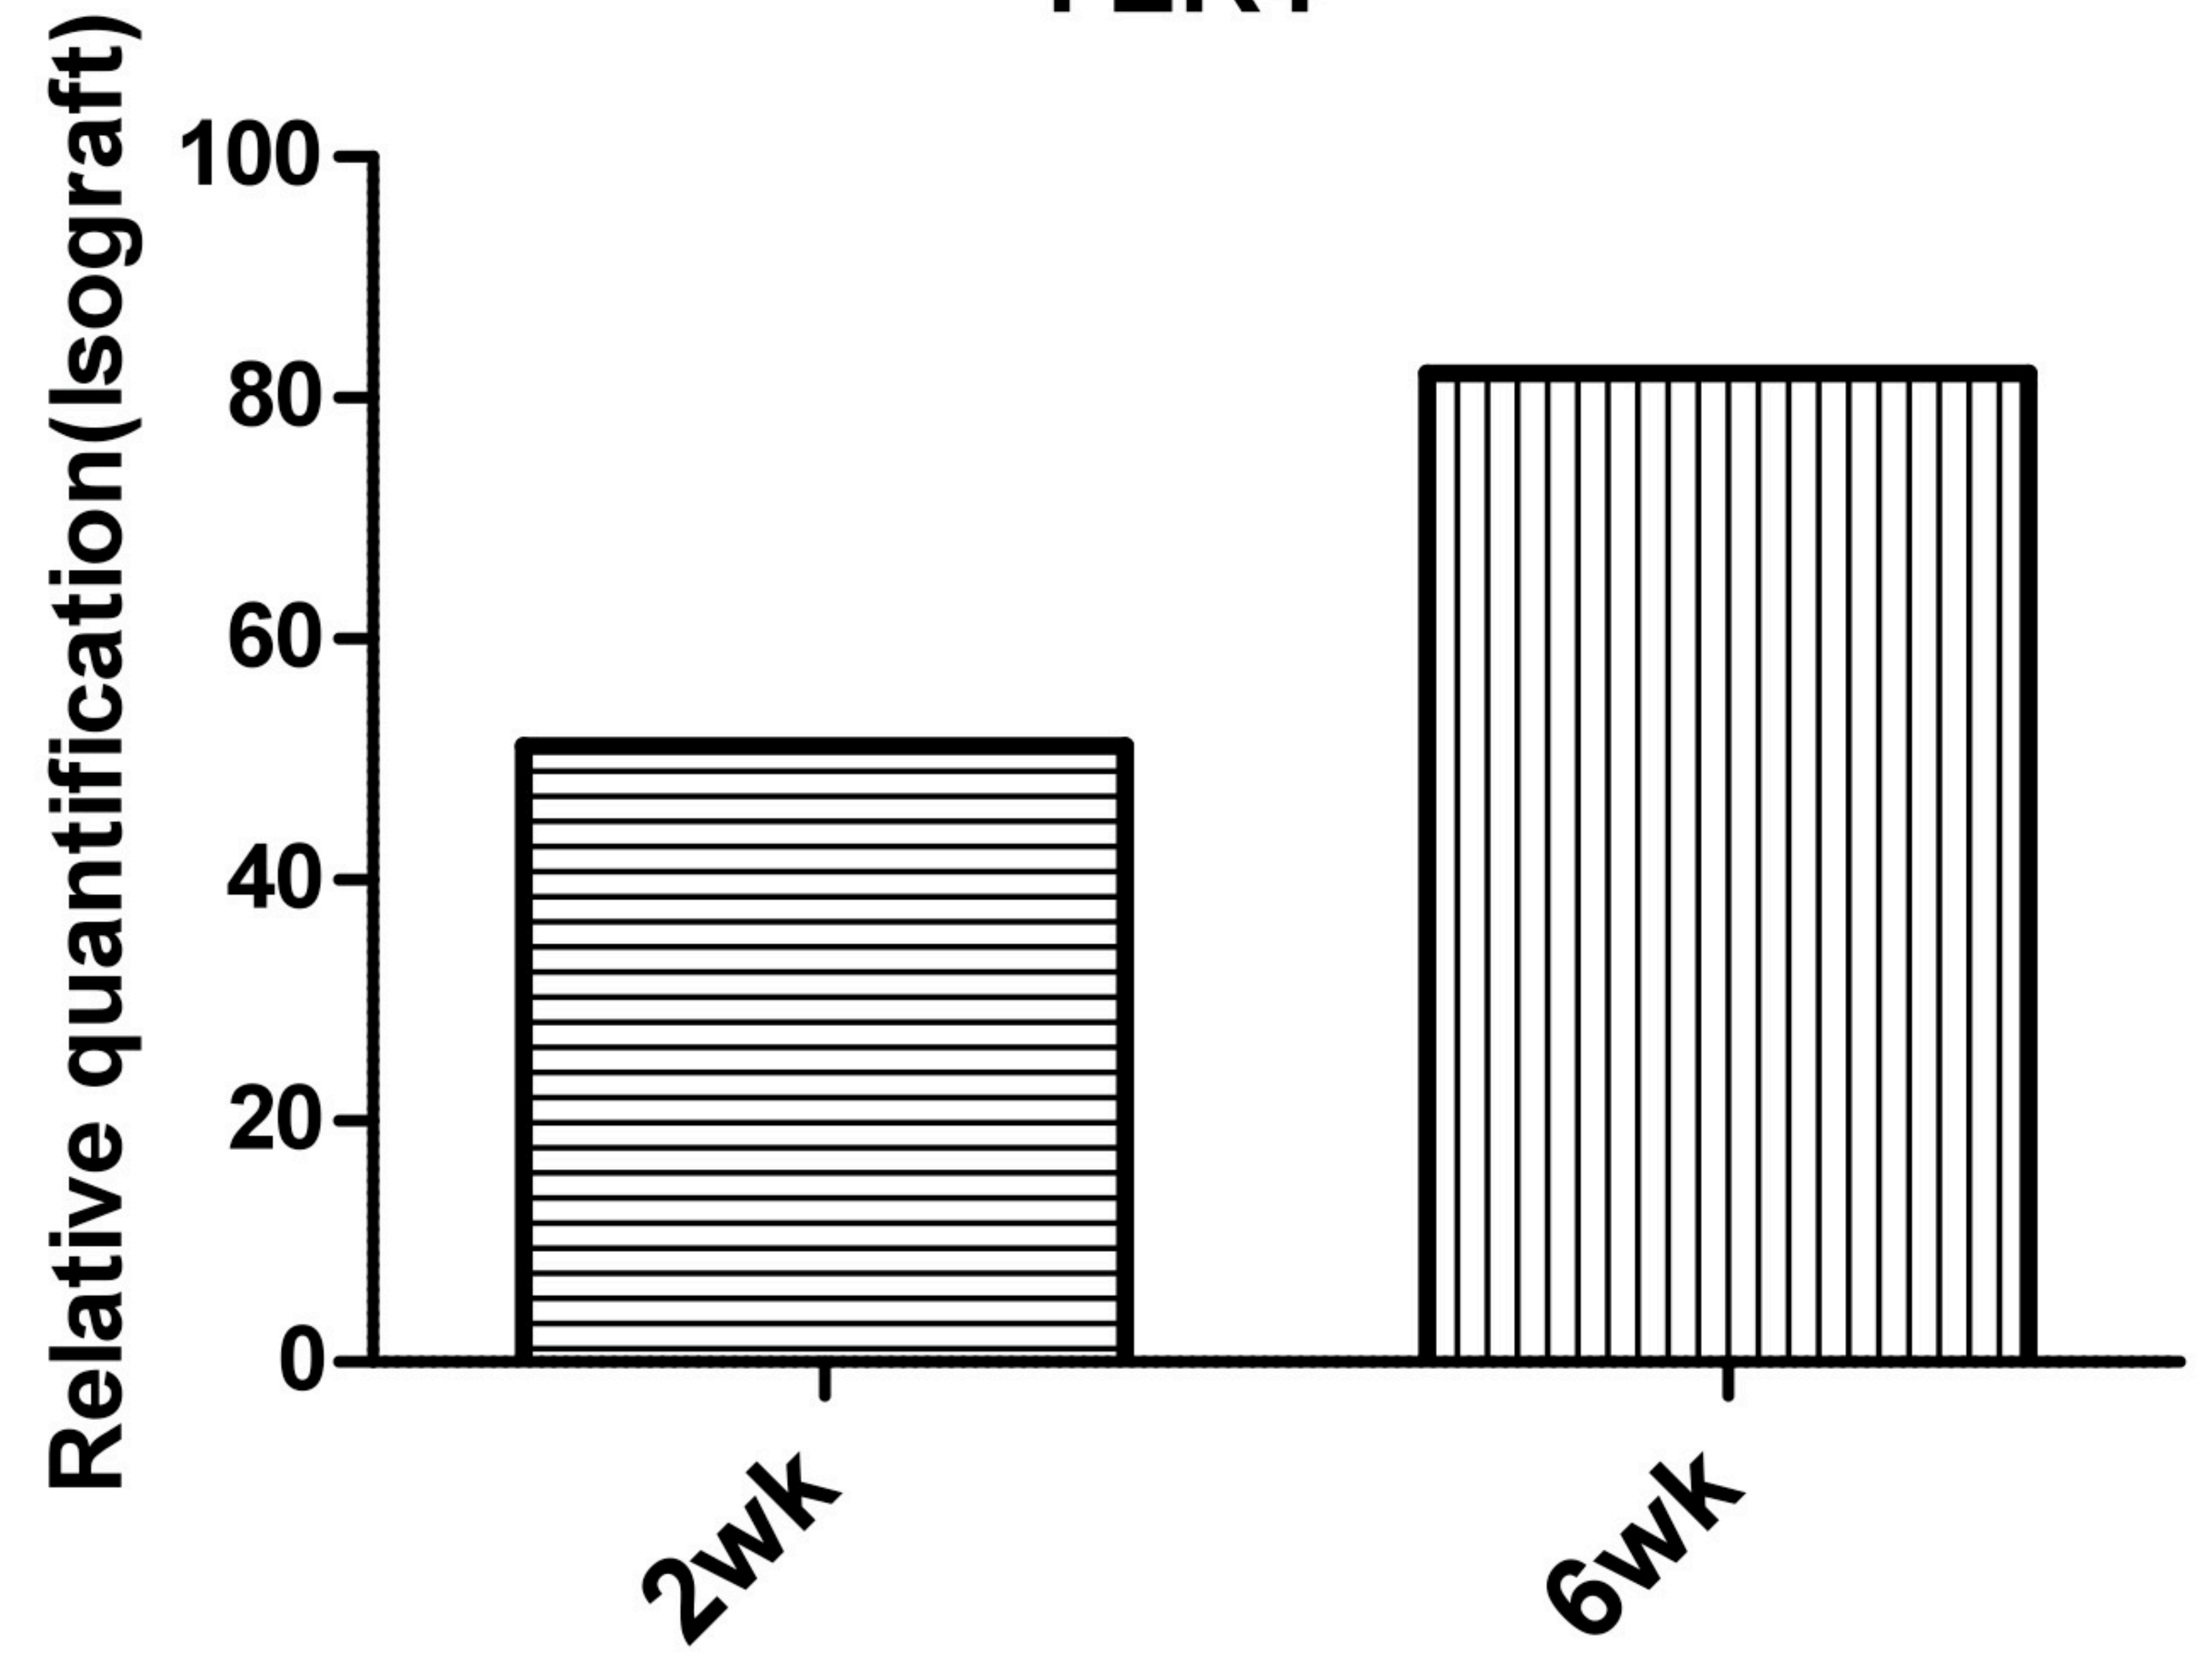

Supplement: NIHMS629422-supplement-Supp_FigureS1-S5.pdf [file NIHMS629422-supplement-Supp_FigureS1-S5.pdf]
